# Supplementary material
Source: Springer Nature journal article supplement (https://www.springermedizin.de/resource/supplementary/13018_2006_3_MOESM1_ESM.pdf/9636148)

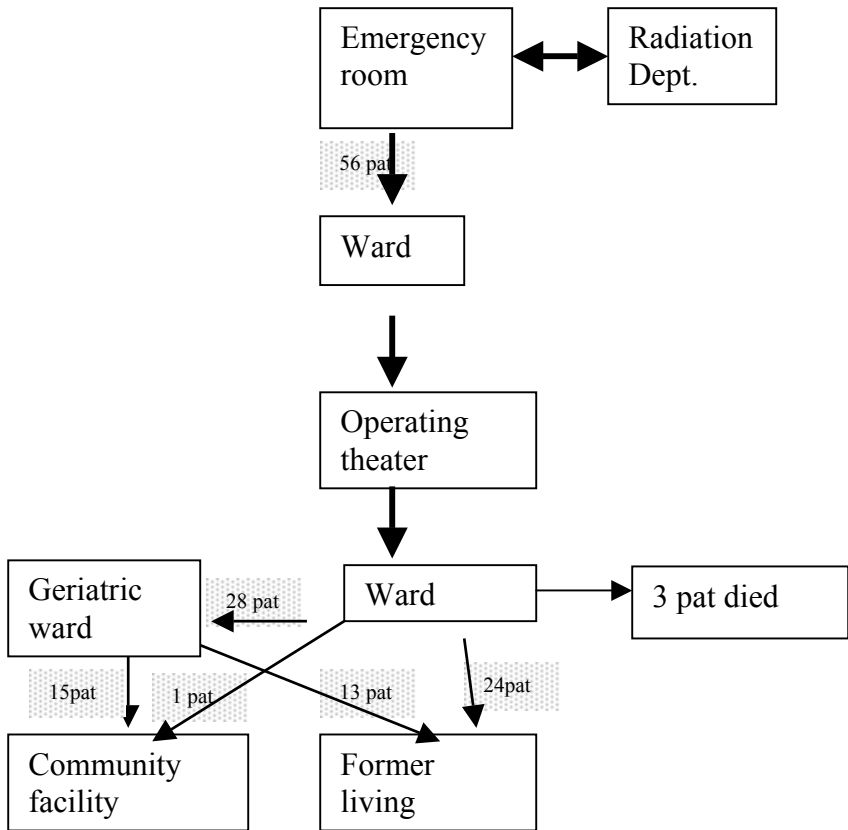

Supplement: MOESM1 [file 9636148]
